# Supplementary material for: Polymer-assisted intratumoral delivery of ethanol: Preclinical investigation of safety and efficacy in a murine breast cancer model
Source: PubMed Central journal article supplement (PMC7843014; doi:10.1371/journal.pone.0234535), 2021-01-28
Supplement: pone.0234535.s001.pdf [file pone.0234535.s001.pdf]

| Group               | Number of Mice | Systemic Adverse Events |                      |                     | Localized Adverse Events |          |                      |            |
|---------------------|----------------|-------------------------|----------------------|---------------------|--------------------------|----------|----------------------|------------|
|                     |                | Lethality               | Respiratory Distress | Loss in Body Weight | Mobility Impairment      | Bleeding | Inflammation / Edema | Ulceration |
| Untreated Control   | 18             | 0 (0%)                  | 0 (0%)               | 0 (0%)              | 3 (17%)                  | 0 (0%)   | 4 (22%)              | 7 (39%)    |
| Ethanol 6 mL/kg     | 16             | 0 (0%)                  | 0 (0%)               | 0 (0%)              | 7 (44%)                  | 7 (44%)  | 6 (38%)              | 14 (88%)   |
| “Repeated Ethanol”  | 5              | 0 (0%)                  | 0 (0%)               | 0 (0%)              | 3 (60%)                  | 0 (0%)   | 2 (40%)              | 4 (80%)    |
| EC-Ethanol 2 mL/kg  | 16             | 0 (0%)                  | 0 (0%)               | 0 (0%)              | 0 (0%)                   | 0 (0%)   | 1 (6%)               | 3 (19%)    |
| EC-Ethanol 4 mL/kg  | 18             | 1 (6%)                  | 0 (0%)               | 1 (6%)              | 1 (6%)                   | 0 (0%)   | 1 (6%)               | 5 (28%)    |
| EC-Ethanol 6 mL/kg  | 18             | 0 (0%)                  | 0 (0%)               | 1 (6%)              | 3 (17%)                  | 0 (0%)   | 3 (16%)              | 9 (50%)    |
| EC-Ethanol 8 mL/kg  | 10             | 1 (10%)                 | 3 (30%)              | 0 (0%)              | 4 (40%)                  | 0 (0%)   | 4 (40%)              | 5 (100%)   |
| EC-Ethanol 10 mL/kg | 4              | 0 (0%)                  | 1 (25%)              | 0 (0%)              | 2 (50%)                  | 0 (0%)   | 3 (75%)              | 4 (100%)   |
