# Supplementary material for: Polymer-assisted intratumoral delivery of ethanol: Preclinical investigation of safety and efficacy in a murine breast cancer model
Source: PubMed Central journal article supplement (PMC7843014; doi:10.1371/journal.pone.0234535), 2021-01-28
Supplement: pone.0234535.s002.pdf [file pone.0234535.s002.pdf]

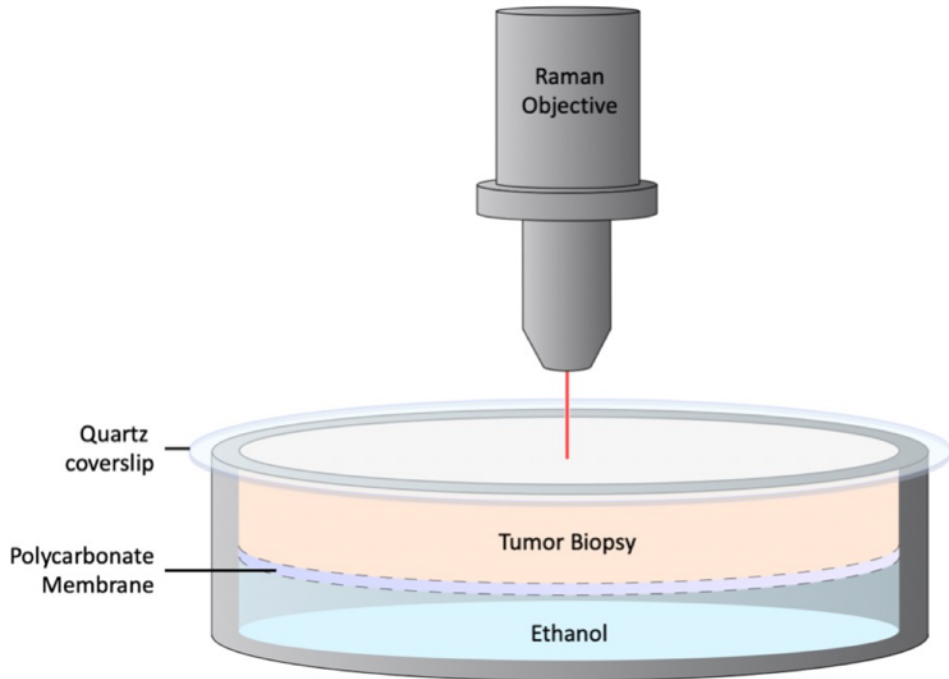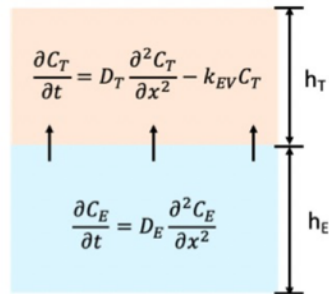

Initial Conditions:

$$C_t(x,0) = 0$$

$$C_E(x,0) = 0$$

Boundary Conditions:

$$\frac{\partial C_T}{\partial x} = 0 \quad @ (x = 0)$$

$$C_T = \phi_T C_E \quad @ (x = h_T)$$

$$D_T \frac{\partial^2 C_T}{\partial x^2} = D_E \frac{\partial^2 C_E}{\partial x^2} \quad @ (x = h_T)$$

$$\frac{\partial C_E}{\partial x} = 0 \quad @ (x = h_T + h_E)$$
