# Supplementary material for: Polymer-assisted intratumoral delivery of ethanol: Preclinical investigation of safety and efficacy in a murine breast cancer model
Source: PubMed Central journal article supplement (PMC7843014; doi:10.1371/journal.pone.0234535), 2021-01-28

**A**

EC-Ethanol

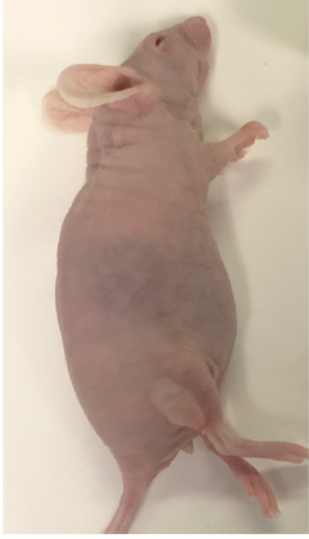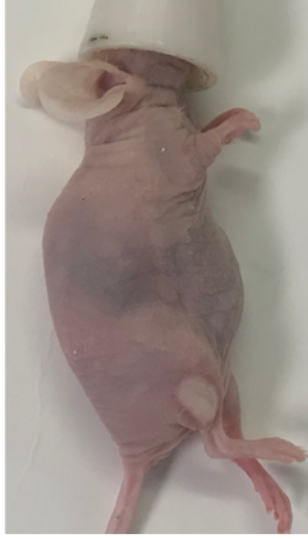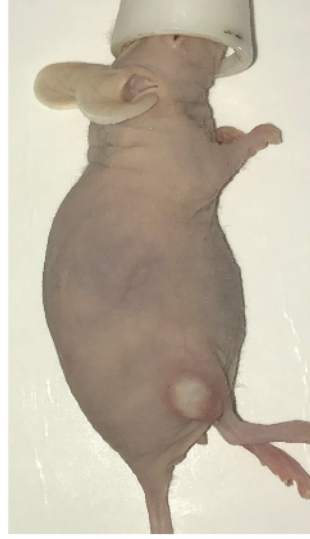

**B**

Ethanol

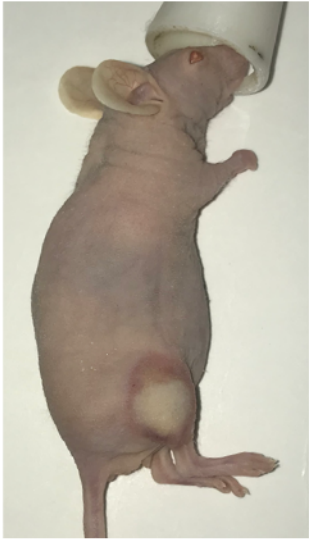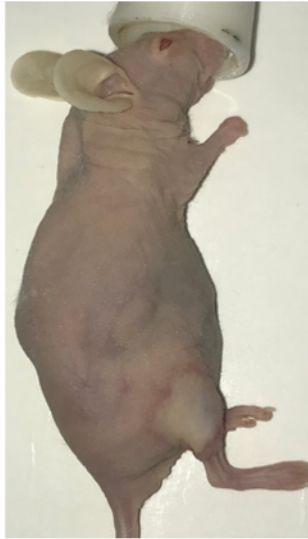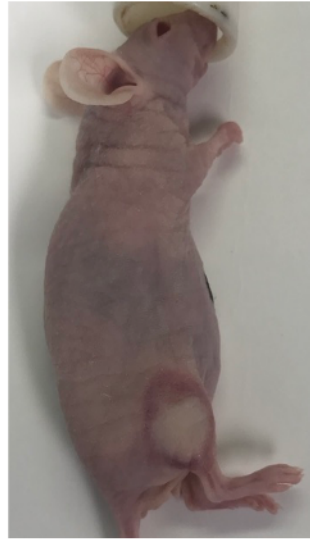

Supplement: pone.0234535.s003.pdf [file pone.0234535.s003.pdf]
